# Supplementary material for: Longitudinal transitions in frailty and their impact on quality of life investigated by a 5-year community study
Source: Research Square preprint supplement (doi:10.21203/rs.3.rs-5729095/v1), 2025-03-31
Supplement: Supplementary file 1 [file 812be22026e600d62ed15b8d.pdf]

# Supplementary Table 1.

## Background characteristics of the excluded participants compared to the analytic cohort in 2014

|                                        | Overall participants<br>in 2014<br>(n = 583) | Participants not<br>attended 2019<br>(n = 352) | Participants with<br>missing J-CHS<br>(n = 107) | Analytic cohort<br>(n = 124) | P-value* |
|----------------------------------------|----------------------------------------------|------------------------------------------------|-------------------------------------------------|------------------------------|----------|
| Age, years                             | 66 [59–71]                                   | 66 [60–72]                                     | 66 [56–70]                                      | 66 [60–69]                   | 0.68     |
| Women                                  | 59%                                          | 60%                                            | 61%                                             | 52%                          | 0.20     |
| Comorbidities                          |                                              |                                                |                                                 |                              |          |
| Hypertension                           | 34%                                          | 35%                                            | 28%                                             | 30%                          | 0.23     |
| Diabetes                               | 13%                                          | 11%                                            | 16%                                             | 15%                          | 0.28     |
| Chronic kidney disease                 | 14%                                          | 13%                                            | 19%                                             | 13%                          | 0.26     |
| Cerebrovascular disease                | 3%                                           | 4%                                             | 1%                                              | 2%                           | 0.18     |
| Ischemic heart disease                 | 6%                                           | 6%                                             | 5%                                              | 4%                           | 0.56     |
| Cancer                                 | 5%                                           | 6%                                             | 5%                                              | 3%                           | 0.45     |
| Body mass index, kg/m <sup>2</sup>     | 23.7 [21.5–26.1]                             | 23.7 [21.4–26.2]                               | 23.6 [21.6–26.5]                                | 24.2 [21.6–25.5]             | 0.99     |
| Fat mass index, kg/m <sup>2</sup>      | 7.1 [5.5–8.9]                                | 6.8 [5.5–9.1]                                  | 7.3 [5.5–8.9]                                   | 7.2 [5.5–8.7]                | 0.99     |
| Fat-free mass index, kg/m <sup>2</sup> | 16.4 [15.1–17.8]                             | 16.1 [15.0–17.6]                               | 16.3 [15.3–18.1]                                | 16.7 [15.5–18.0]             | 0.052    |
| Body fat percentage, %                 | 29.5 [24.5–34.8]                             | 29.7 [24.6–34.7]                               | 29.4 [25.1–35.7]                                | 28.7 [23.8–34.3]             | 0.25     |
| Grip strength, kg                      | 25.5 [20.5–33.6]                             | 24.5 [19.5–32.5]                               | 26.0 [21.0–35.5]                                | 27.8 [22.0–36.5]             | 0.005    |
| 10-m walking, sec                      | 5.6 [5.2–6.2]                                | 5.8 [5.3–6.3]                                  | 5.7 [5.1–6.1]                                   | 5.4 [5.0–6.0]                | 0.003    |
| Laboratory measurements                |                                              |                                                |                                                 |                              |          |
| Hemoglobin, g/dL                       | 13.6 [12.7–14.6]                             | 13.6 [12.8–14.6]                               | 13.5 [12.6–14.6]                                | 13.8 [12.9–14.5]             | 0.76     |
| Albumin, g/dL                          | 4.4 [4.3–4.6]                                | 4.5 [4.3–4.6]                                  | 4.4 [4.3–4.6]                                   | 4.5 [4.3–4.6]                | 0.89     |
| Creatinine, mg/dL                      | 0.71 [0.62–0.83]                             | 0.71 [0.62–0.84]                               | 0.70 [0.61–0.78]                                | 0.72 [0.64–0.85]             | 0.89     |
| Potassium, mEq/L                       | 4.2 [4.0–4.4]                                | 4.2 [4.0–4.4]                                  | 4.1 [4.0–4.3]                                   | 4.2 [4.0–4.4]                | 0.074    |
| Total cholesterol, mg/dL               | 210 [189–231]                                | 210 [188–231]                                  | 215 [192–237]                                   | 207 [190–228]                | 0.20     |

Data are expressed as median [interquartile range] for continuous variables and as percentage for categorical variables. P <0.05 is statistically significant.

J-CHS, Japanese Cardiovascular Health Study

\*Kruskal-Wallis test or Pearson's chi-squared test between groups that did not participate in 2019, participants with missing J-CHS data, and the analytic cohort.
